# Supplementary material
Source: publisher site journal article supplement (https://www.dovepress.com/article/385692)
Supplement: Supplementary file 1 [file get_supplementary_file.php]

**Questionnaire to assess Knowledge of Antibiotics, Antimicrobial Resistance and Antimicrobial Stewardship Concepts Among Final Year Undergraduate Pharmacy Students in Northern Nigeria**

**Section A: Demographic characteristics**

1. Gender:
2. Male
3. Female
4. Age: …………………
5. During your time in pharmacy school, did you offer any course(s) that covered topics including antibiotics, antimicrobial resistance and related concepts?
6. Yes
7. No
8. How many of such courses did you offer? ………………………………….
9. Under what departments were these courses taught? (Tick all that apply)
10. Pharmaceutical microbiology
11. Pharmacognosy
12. Clinical Pharmacy
13. Pharmaceutics
14. Pharmaceutical chemistry
15. Pharmacology
16. Others: please specify…………………………………………………………

**Section B: Knowledge of antibiotics and antimicrobial resistance**

1. Which of the following conditions should be treated with antibiotics? (Tick all that apply)
2. HIV/AIDS Malaria
3. Gonorrhea Measles
4. Urinary tract infections Skin or wound infections
5. Diarrhea Sore throat
6. Cold and flu Body aches and pain
7. Fever Headaches
8. Which of the following terms have you heard of? (Tick all that apply)
9. AMR
10. Antibiotic resistance
11. Superbugs
12. Antimicrobial resistance
13. Drug resistance
14. Antibiotic resistant bacteria
15. I have not heard of any of these terms
16. …………….. occurs when bacteria, viruses, fungi and parasites change over time and no longer respond to medicines, making infections harder to treat (Tick all that apply).
17. AMR
18. Antibiotic resistance
19. Superbugs
20. Antimicrobial resistance
21. Drug resistance
22. Antibiotic resistant bacteria
23. I do not know
24. Vancomycin resistant enterococcus, methicillin resistant staphylococcus and multi-drug resistant mycobacterium tuberculosis are all examples of ……………………… (Tick all that apply).
25. AMR
26. Antibiotic resistance
27. Superbugs
28. Antimicrobial resistance
29. Drug resistance
30. Antibiotic resistant bacteria
31. I do not know
32. Antimicrobial resistance is promoted by? (Tick all that apply)
33. Widespread/overuse of antimicrobials in humans
34. Widespread/overuse of antimicrobials in animal livestock production
35. Use of broad-spectrum antimicrobials when narrow spectrum ones are available
36. Poor handwashing practices
37. Poor patient adherence to medication
38. Substandard quality of some antimicrobial drugs
39. I do not know
40. Interventions that may be useful in combating antimicrobial resistance include. (Tick all that apply)
41. Developing national and institutional antimicrobial usage policies
42. Reducing antimicrobial use in humans
43. Reducing antimicrobial use in animal livestock
44. Establishing centers for national antimicrobial resistance surveillance
45. Educating health professionals and members of the public on rational antimicrobial use
46. Developing new antimicrobial drugs
47. I do not know

***Please tick only one option (either true, false or I do not know) for each of the statements below***

|  | **Statement** | **True** | **False** | **I do not know** |
| --- | --- | --- | --- | --- |
|  | There are many classes of antibiotics |  |  |  |
|  | Antibiotics can kill normal bacterial flora in the body |  |  |  |
|  | Better use of antibiotics will not have an impact on antimicrobial resistance |  |  |  |
|  | Prescribing broad spectrum antibiotics is always better even if there are narrower spectrum antibiotics that are effective |  |  |  |
|  | Antibiotics should be used within the community for prophylaxis of infections like typhoid and pneumonia |  |  |  |
|  | Patients should stop taking their prescribed/recommended antibiotics as soon as they start to feel better |  |  |  |
|  | Antibiotic resistant infections could make medical procedures like surgery, organ transplants and cancer treatment much more difficult |  |  |  |
|  | Antibiotic resistance occurs when the human body becomes resistant to antibiotics, and they no longer work |  |  |  |
|  | Antimicrobial resistance is only a problem for people who use antibiotics |  |  |  |
|  | Intravenous antibiotic therapy is preferred over oral therapy for most patients |  |  |  |

**Section C: Knowledge of antimicrobial stewardship**

1. Do you know what the term “antimicrobial stewardship” means?
2. Yes
3. No
4. Unsure

***If your answer to question (1) above is no or unsure, please skip the rest of the questions in this section, and move to section D***

1. If your answer to question (1) above is yes, where did you first come across it?

………………………………………………………………………………………………………………………………………………………………………………………………………………………………………………………………………………………………

1. Antimicrobial stewardship covers (Tick all that apply)
2. The study of antimicrobials
3. Choosing antimicrobials appropriately
4. Selecting suitable dosing regimens for antimicrobials
5. Selecting suitable routes of administration for antimicrobials
6. Choosing appropriate duration of therapy for antimicrobial drugs
7. I do not know
8. Goals of antimicrobial stewardship include: (Tick all that apply)
9. Increasing antimicrobial use
10. Reducing hospital stay
11. Increasing duration of antimicrobial therapy to ensure maximum therapeutic efficacy
12. Increasing the use of broad-spectrum antibiotics
13. Reducing antimicrobial resistance
14. Minimizing toxicity and other adverse effects of antimicrobials
15. I do not know
16. Members of an antimicrobial stewardship team can include: (Tick all that apply)
17. Doctors
18. Occupational therapists
19. Hospital pharmacists
20. Community pharmacists
21. Hospital cleaning staff
22. Nurses
23. Laboratory scientists
24. I do not know
25. Roles for a pharmacist with respect to antimicrobial stewardship can include: (Tick all that apply)
26. Promoting optimal use of antimicrobial agents
27. Prescribing antimicrobial agents over the counter
28. Educating other healthcare professionals about antimicrobials
29. Working with therapeutic committees to develop antimicrobial usage policies
30. Tracking and reporting antimicrobial consumption patterns
31. I do not know

**Section D: Self-assessment of knowledge of antimicrobials, antimicrobial resistance and antimicrobial stewardship**

***(Please tick only one option per statement. SA= Strongly agree. A= Agree, N= Neutral, D= Disagree, SD= Strongly disagree)***

| **Statement** | **SA** | **A** | **N** | **D** | **SD** |
| --- | --- | --- | --- | --- | --- |
| I feel prepared to know whether to recommend an antimicrobial to a patient or not |  |  |  |  |  |
| I feel prepared to know when to recommend that a patient start antimicrobial therapy |  |  |  |  |  |
| I feel prepared to know how to select the best antimicrobial for a patient. |  |  |  |  |  |
| I feel prepared to know which route of administration is best for a patients’ antimicrobial therapy. |  |  |  |  |  |
| I know the correct and relevant specimens to be collected from patients that can be used to identify various infections |  |  |  |  |  |
| My current knowledge of antimicrobials is adequate for my future career as a pharmacist |  |  |  |  |  |
| My current knowledge of antimicrobial resistance is adequate for my future career as a pharmacist |  |  |  |  |  |
| My current knowledge of antimicrobial stewardship is adequate for my future career as a pharmacist |  |  |  |  |  |
| I would like more education on the appropriate use of antimicrobials |  |  |  |  |  |
| I would like more education on antimicrobial resistance |  |  |  |  |  |
| I would like more education on antimicrobial stewardship |  |  |  |  |  |

Notes: Adapted from Burger M, Fourie J, Loots D, et al. Knowledge and perceptions of antimicrobial stewardship concepts among final year pharmacy students in pharmacy schools across South Africa. *South Afr J Infect Dis*. 2016;31(3):84–90. doi:10.1080/23120053.2016.1192808.12

Adapted from Sakeena MHF, Bennett AA, Jamshed S, et al. Investigating knowledge regarding antibiotics and antimicrobial resistance among pharmacy students in Sri Lankan universities. *BMC Infect Dis*. 2018;18(1):209. doi:10.1186/s12879-018-3107-8.13

Adapted from Sakeena MHF, Bennett AA, Carter SJ, et al. A comparative study regarding antibiotic consumption and knowledge of antimicrobial resistance among pharmacy students in Australia and Sri Lanka. *PLoS One*. 2019;14(3):e0213520. doi:10.1371/journal.pone.0213520.14

Adapted from Lubwama M, Onyuka J, Ayazika KT, et al. Knowledge, attitudes, and perceptions about antibiotic use and antimicrobial resistance among final year undergraduate medical and pharmacy students at three universities in East Africa. PLoS One. 2021;16(5):e0251301. doi:10.1371/journal.pone.0251301.15

Adapted from Ahmed N, Abujheisha K, Balaha M. Pharmacy students’ knowledge and perceptions about antimicrobial stewardship. J Pharm Res Int. 2019;31(1):1–8. doi:10.9734/jpri/2019/v31i130291.20
